# Supplementary material for: Performance of Vehicle Add-on Mobile Monitoring System PM 2.5 measurements during wildland fire episodes
Source: Royal Society of Chemistry journal article supplement (doi:10.1039/d3ea00170a), 2024-01-01
Supplement: d3ea00170a1.pdf [file d3ea00170a1.pdf]

|    |                                                                                                                 |    |
|----|-----------------------------------------------------------------------------------------------------------------|----|
| 1  | <i>Supplement of</i>                                                                                            |    |
| 2  | <b>Performance of Vehicle Add-On Mobile Monitoring System</b>                                                   |    |
| 3  | <b>PM<sub>2.5</sub> Measurements During Wildland Fire Episodes</b>                                              |    |
| 4  |                                                                                                                 |    |
| 5  | <b>Ashley S. Bittner et al.</b>                                                                                 |    |
| 6  |                                                                                                                 |    |
| 7  | <i>Correspondence to:</i> Ashley Bittner ( <a href="mailto:bittner.ashley@epa.gov">bittner.ashley@epa.gov</a> ) |    |
| 8  |                                                                                                                 |    |
| 9  | S1 Details of Vehicle Add-On Mobile Monitoring System.....                                                      | 1  |
| 10 | S2 Details of source subtraction method .....                                                                   | 7  |
| 11 | S3 Details of instrument corrections.....                                                                       | 10 |
| 12 | VAMMS .....                                                                                                     | 10 |
| 13 | PurpleAir.....                                                                                                  | 12 |
| 14 | Ambilabs nephelometer .....                                                                                     | 16 |
| 15 | S4 AQI PM <sub>2.5</sub> Category Definitions.....                                                              | 17 |
| 16 | S5 Details of Cedar Creek fire .....                                                                            | 18 |
| 17 | S6 Details of Konza Prairie prescribed burns .....                                                              | 19 |
| 18 | S7 Details of high-time resolution measurements .....                                                           | 25 |
| 19 | References.....                                                                                                 | 26 |
| 20 |                                                                                                                 |    |
| 21 |                                                                                                                 |    |
| 22 |                                                                                                                 |    |

### 23 **S1 Details of Vehicle Add-On Mobile Monitoring System**

24           The VAMMS mobile PM monitor is self-contained in a crush-proof case (Figure S1) designed to  
25 be operated in any vehicle. VAMMS data is formatted for use with EPA's Real Time Geospatial Data  
26 Viewer (RETIGO - <https://www.epa.gov/hesc/real-time-geospatial-data-viewer-retigo>). RETIGO is an  
27 online app that the VAMMS operator can upload VAMMS data to for automatic generation of maps and  
28 timeseries of measurement data. The VAMMS is easiest to operate in the passenger or back passenger seat  
29 immediately next to a window to allow the sample probe to be installed on the window (Figure S2).

30

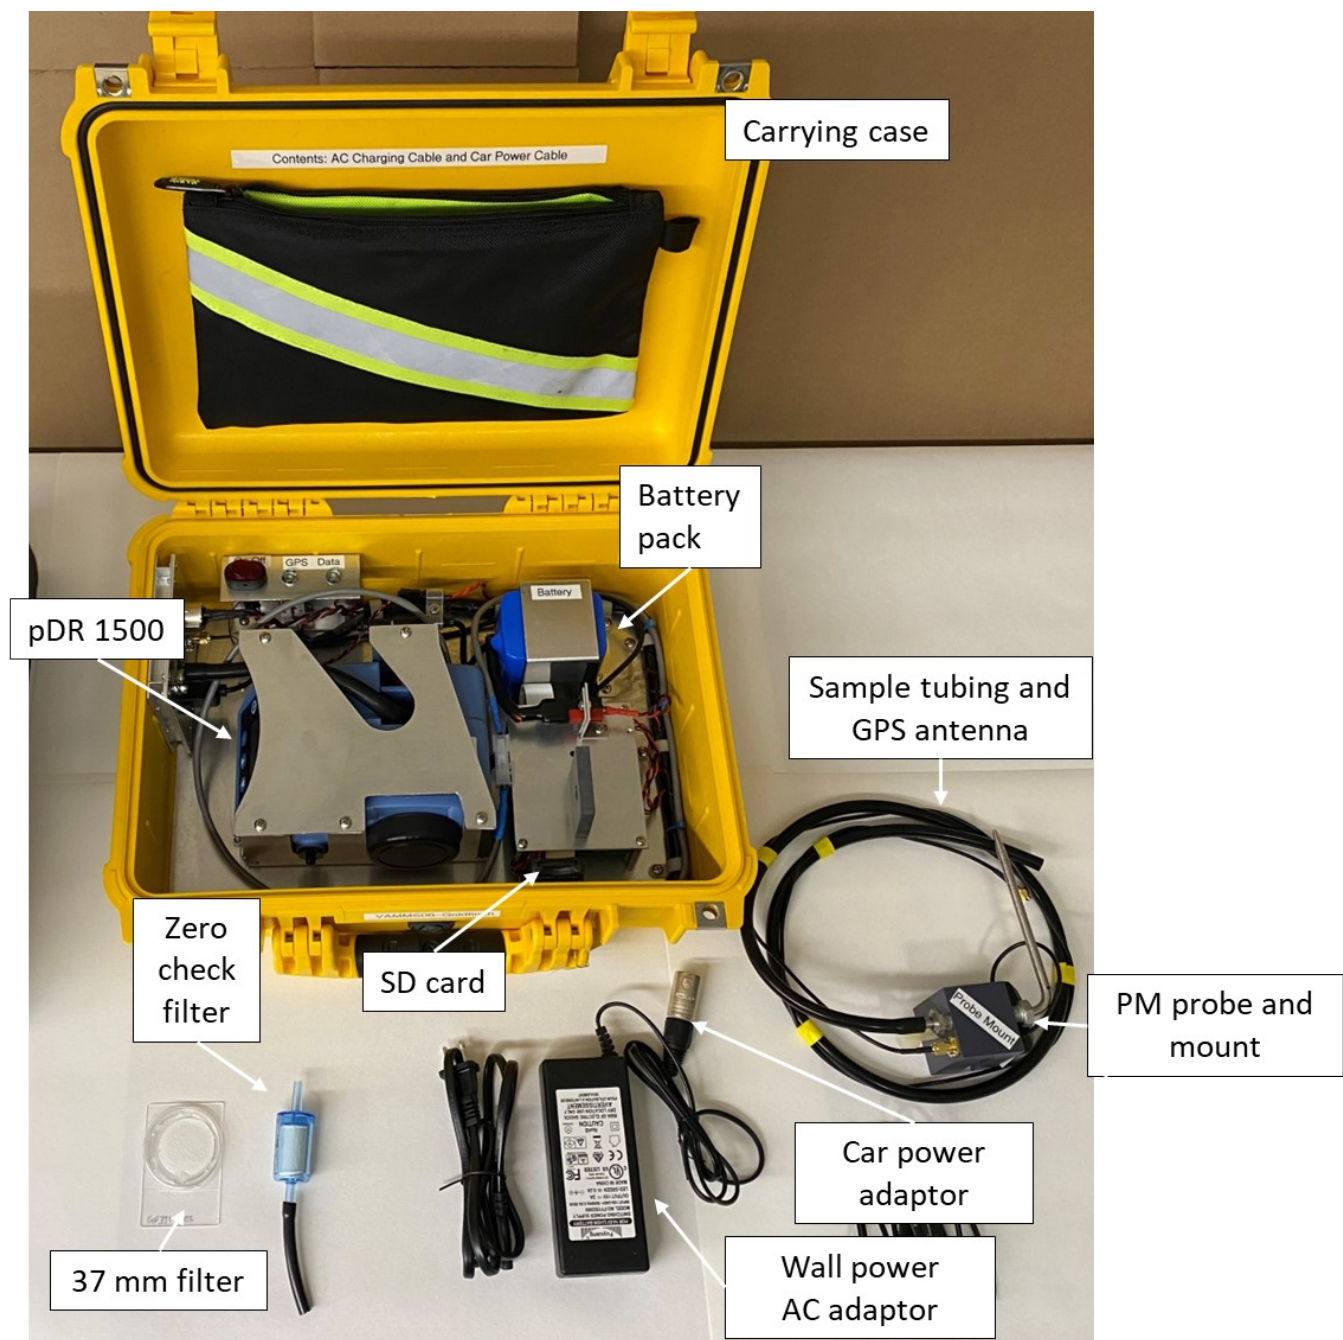

31

32 **Figure S1:** The VAMMS package contains the following components: PM monitor (pDR-1500, Thermo Scientific),  
 33 GPS (Ultimate GPS Breakout, Adafruit), data logger, local SD card data storage, lithium-ion battery (12V 45 W),  
 34 sampling probe and window mount with sample tubing and GPS antenna, 120V AC power cord, auxiliary car power  
 35 cord, zero check HEPA filter, and spare 37 mm filter for PM collection.

36

37

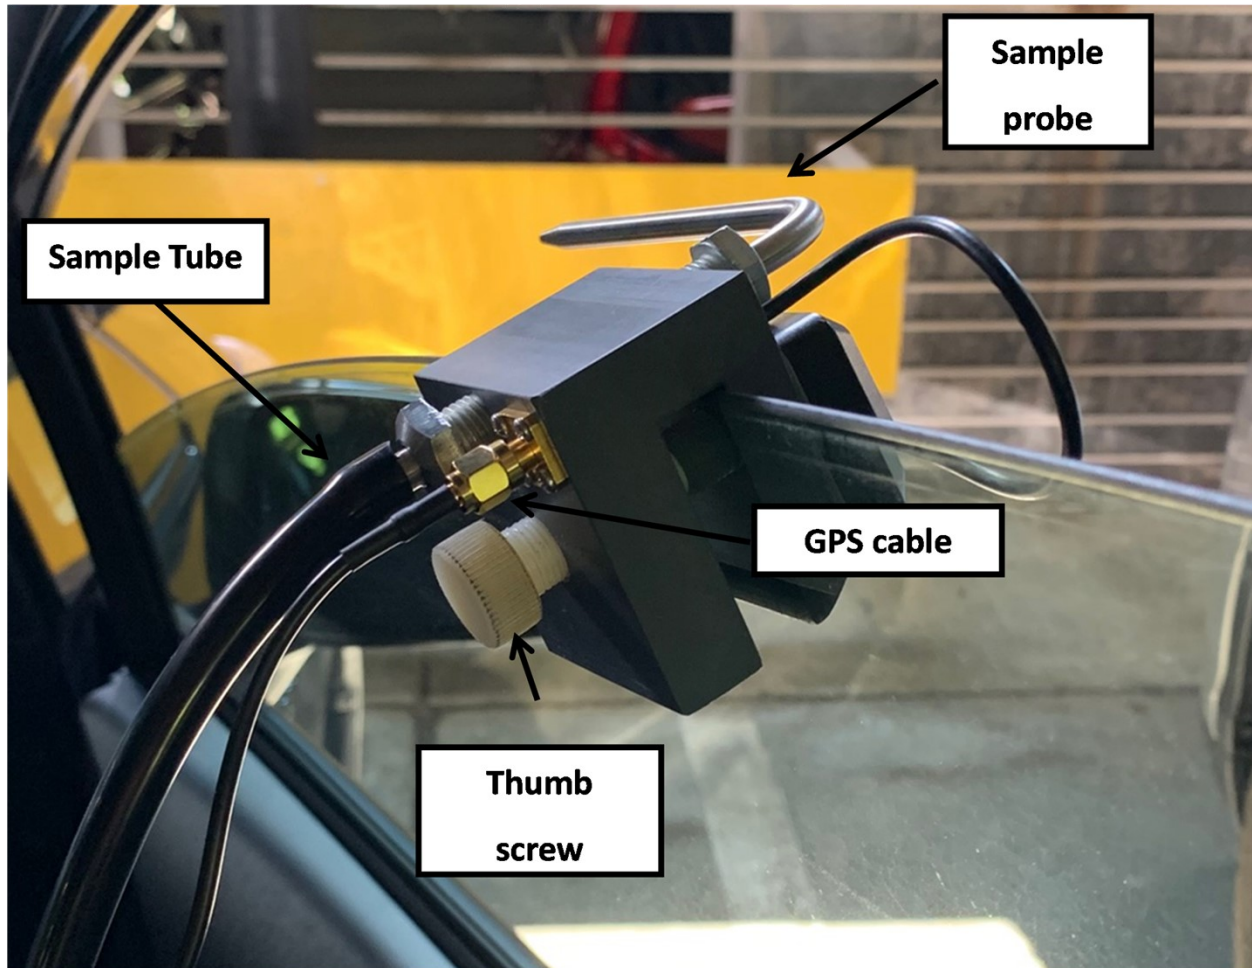

39

40 **Figure S2:** The sampling configuration of the VAMMS on the passenger window of a vehicle. The sample probe is  
41 connected to the sample tube, which connects to an inlet on the exterior of the VAMMS case. An interior tube connects  
42 the sample tube to the pDR-1500. The GPS cable is also attached to its own inlet on the VAMMS case. The probe  
43 faces forward into the airstream to sample PM as the VAMMS is driving. The thumbscrew is used to tighten the  
44 mount in place.

45

46

47 We determined the isokinetic sampling vehicle velocity for this probe to be approximately 35 mph  
48 using the following approach:

$$49 \quad v_{probe} = \frac{Q}{A} = \frac{Q}{\pi R^2} = \frac{5.833 * 10^{-5} \frac{m^3}{s}}{\pi(1.065 * 10^{-3} m)^2}$$
$$50 \quad = 16.37 m/s = 36.6 MPH \approx 35 MPH$$

51

52 where Q is the sampling flow rate (3.5 LPM), and R is the radius of the probe inlet ( $D/2 = 0.084''/2$ ).

53 Faster or slower sampling velocities can result in anisokinetic sampling conditions which impact  
54 how particles are quantified. To explore this effect on our data sets, we first determined the median driving  
55 speed for each campaign (Table S1).

56 **Table S1:** Median and mean ( $\pm$  standard deviation) driving speed (mph) for each field data collection campaign:  
57 Cedar Creek wildfire (OR), Monument wildfire (CA), and Konza Prairie prescribed burns (KS). The Konza  
58 Prairie data were collected using an all-terrain vehicle on non-road terrain, so the driving speeds were much lower  
59 than the wildfire samples which were collected using on-road vehicles on traditional roadways and highways.  
60

|                | Median speed<br>(mph) | Mean speed $\pm$ sd<br>(mph) |
|----------------|-----------------------|------------------------------|
| 61 Cedar Creek | 38.9                  | $37 \pm 27$                  |
| 62 Monument    | 31.1                  | $30 \pm 26$                  |
| Konza Prairie  | 5.6                   | $6.6 \pm 5.3$                |

63

64 At higher velocities (e.g., Cedar Creek), sampling is subisokinetic (probe velocity < vehicle  
65 velocity) which leads to over-sampling of high-inertia coarse particles. Conversely at slower velocities  
66 (e.g., Konza Prairie), sampling is superisokinetic (probe velocity > vehicle velocity) leading to an over-  
67 sampling of low-inertia fine particles<sup>1</sup>. To quantify the mass error, we first used the Particle Loss Calculator  
68 Tool<sup>2</sup> to estimate sampling efficiency (i.e., how efficiently aerosol particles are drawn into the described  
69 probe) across a range of particle sizes from 0.01 to 5  $\mu m$  at the median velocity for each of our data  
70 collection campaigns (Figure S3).

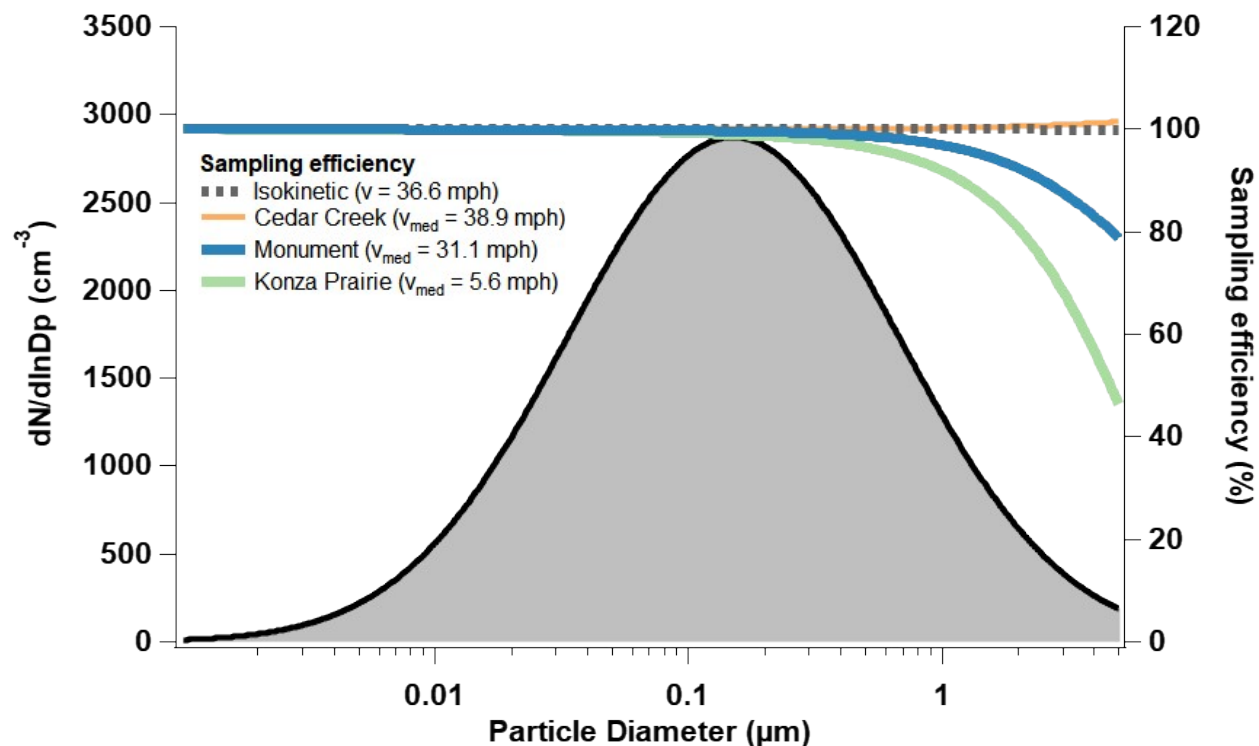

71

72

73 **Figure S3:** Simulated particle size distribution ( $N=5400$ , geometric mean diameter =  $200 \mu\text{m}$ , geometric standard  
 74 deviation =  $1.5$ )<sup>1</sup> as a function of particle diameter ( $\mu\text{m}$ ) for aerosol typical of biomass combustion. The sampling  
 75 efficiency (%) at each particle diameter for the median sampling velocity for each field dataset (Cedar Creek,  
 76 Monument, Konza Prairie) is given on the right axis. Isokinetic or ideal sampling is shown as the black dotted  
 77 line. The median velocity is given in parenthesis in the figure legend. At efficiencies greater than 100%, more  
 78 large aerosol particles are drawn inside the sampling tube than were originally included in the sampling volume,  
 79 and efficiencies less than 100% describes the opposite. Sampling efficiency source: Particle Loss Calculator  
 80 Tool<sup>2</sup>.

81

82 Many studies have shown that biomass aerosol is mostly submicron in size and can be unimodal or  
 83 bimodal with a geometric mean diameter of  $\sim 150 \text{ nm}$  and a geometric standard deviation around 1.5 for  
 84 aged aerosol<sup>3-7</sup>. We generated a simulated particle size distribution (PSD) using these parameters reflective  
 85 of biomass burning aerosol (Figure S3). There are few particles above 1 micron, but they account for most  
 86 of the mass (Figure S4).

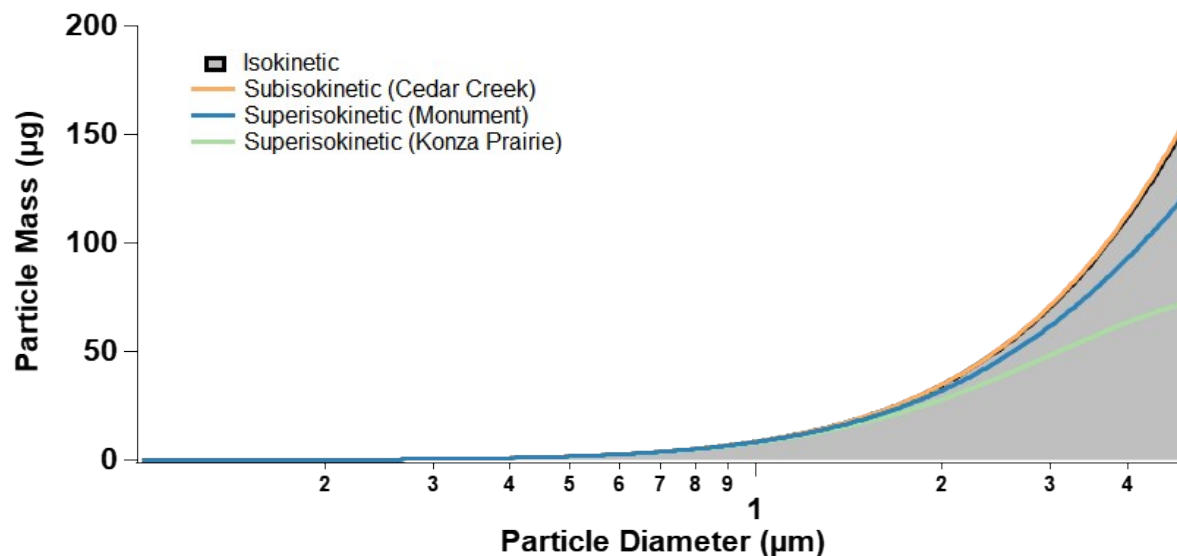

87

88 **Figure S4:** Particle mass ( $\mu\text{g}$ ) versus particle diameter ( $\mu\text{m}$ ) calculated from the simulated biomass burning  
 89 aerosol particle size distribution assuming spherical particles of uniform density. The ideal or true mass is shown  
 90 in grey, measured isokinetically. The colored lines show the mass that would be measured given sub- and  
 91 superisokinetic sampling conditions for each of three datasets (estimated using the median sampling velocity).  
 92

93

94

We convolved the simulated PSD with the sampling efficiency at each particle diameter to estimate  
 95 the percent error in the summed  $\text{PM}_{2.5}$  (particulate matter less than 2.5 microns) mass measurement for each  
 96 field dataset (Table S2). For the Cedar Creek dataset, we found that anisokinetic sampling would result in  
 97 a negligible bias (or overestimate) of 0.47% for the  $\text{PM}_{2.5}$  mass measurement. The impact on the Monument  
 98 dataset was slightly larger but still modest (-6.3%). The impact on the Konza Prairie data set was more  
 99 significant, resulting -16.2% bias, implying that the VAMMS likely underestimated the true mass  
 100 concentration.

101 **Table S2:** Sampling efficiency ( $\eta$ ) at 0.1, 1 and 2.5 micrometers determined using the Particle Loss Calculator  
 102 Tool<sup>2</sup> at isokinetic sampling velocity and the median velocity observed during the three field data set used in this  
 103 analysis. The total  $\text{PM}_{2.5}$  mass ( $\mu\text{g}$ ), based off the simulated particle size distribution, that would be measured by  
 104 each campaign (given the sampling efficiency) is shown and was used to calculate the estimated mass bias (%).

|               | $\eta$ at 0.1 $\mu\text{m}$ | $\eta$ at 1 $\mu\text{m}$ | $\eta$ at 2.5 $\mu\text{m}$ | $\text{PM}_{2.5}$ mass ( $\mu\text{g}$ ) | $\text{PM}_{2.5}$ bias (%) |
|---------------|-----------------------------|---------------------------|-----------------------------|------------------------------------------|----------------------------|
| Isokinetic    | 1.000                       | 1.000                     | 1.000                       | 3173                                     |                            |
| Cedar Creek   | 1.000                       | 1.002                     | 1.007                       | 3188                                     | + 0.47                     |
| Monument Fire | 0.997                       | 0.969                     | 0.900                       | 2972                                     | -6.3                       |
| Konza Prairie | 0.992                       | 0.919                     | 0.746                       | 2660                                     | -16.2                      |

105

106

## 107 **S2 Details of source subtraction method**

108 We estimated the vehicle velocity with the latitude, longitude, and timestamp data using the  
109 Haversine distance function which determines the great-circle distance between two points on a sphere.  
110 The calculated distance (and thus velocity) is only an approximation as this assumes the Earth to be a perfect  
111 sphere. The Haversine (or great circle) distance is given by:

$$112 \quad D(x, y) = 2 \arcsin\left[\sqrt{\sin^2((x1 - y1)/2) + \cos(x1) \cos(y1) \sin^2((x2 - y2)/2)}\right] \quad (\text{Eqn 0})$$

113 Where x1 is the starting latitude, x2 is the ending latitude, y1 is the starting longitude, and y2 is the ending  
114 longitude.

115 A running coefficient of variation (COV) method<sup>8</sup> was used to identify dust spikes in the PM<sub>2.5</sub>  
116 concentration data likely attributable to acceleration of the vehicle on pavement, gravel, or dirt. According  
117 to Brantley et al. (2014)<sup>9</sup>:

118 “The COV method consists of calculating the rolling 5 s standard deviation (2 s before and after the center  
119 data point) and dividing it by the mean concentration of the sampling run. The 99th percentile of the  
120 calculated COV is used as a threshold and any data points with a COV above this threshold are flagged  
121 along with the data points 2 s before and after.”

122 We used the raw 1-s data for source subtraction and the 99<sup>th</sup> percentile to identify and remove dust  
123 spikes. As a secondary check, we visually inspected each timeseries before and after source subtraction  
124 using the coincident velocity timeseries to assess if flagged spikes were related to vehicle acceleration and  
125 not an actual source (see Figure S5 for an example). Using this approach, we adjusted the percentile to the  
126 99.5<sup>th</sup> (instead of 99<sup>th</sup>) in two sampling runs (out of 33 total considered for this paper) where it appeared



127 too much data were flagged for removal. Two sampling runs were not included in the analysis because the  
128 vehicle was stationary for more than 25% of the run. A table of percentiles and threshold values for each  
129 sampling run is given in Table S3. The threshold value ranged between 0.01 and 1.5 depending on the data  
130 set.

131           This procedure flagged < 1% of data on average with most of the flagged events occurring just after  
132 velocity increased or decreased rapidly (Figure S5). The flagged data points were excluded from the PM<sub>2.5</sub>  
133 concentration data for a given sampling run. In this paper, we consider a sampling run to be a single-day  
134 VAMMS deployment event. If the user stopped sampling for a few hours and resumed within the same day,  
135 we considered this to be the same sampling run.

136

137

138

139

140

141

142

143

144

145

146

147

149 **Table S3:** The percentile, COV threshold, and percentage of data removed for each sampling run included in this  
 150 analysis. The event for each file is also given.

| Date           | Percentile   | Threshold   | Data removed (%) | Event            |
|----------------|--------------|-------------|------------------|------------------|
| 8/11/2021      | 99           | 0.06        | 1.00             | Monument Fire    |
| 8/13/2021      | 99           | 0.06        | 1.00             |                  |
| 8/14/2021      | 99           | 0.05        | 1.00             |                  |
| 8/15/2021      | 99           | 0.07        | 1.00             |                  |
| 8/16/2021      | 99           | 0.04        | 1.00             |                  |
| 8/17/2021      | 99.5         | 0.10        | 0.50             |                  |
| 8/19/2021      | 99.5         | 0.12        | 0.50             |                  |
| 8/20/2021      | 99           | 0.22        | 1.00             |                  |
| 8/21/2021*     | 99           | 0.39        | 1.00             |                  |
| 8/24/2021      | 99           | 0.18        | 1.00             |                  |
| 8/25/2021      | 99           | 0.28        | 1.00             |                  |
| 8/26/2021*     | 99           | 0.29        | 1.00             |                  |
| 8/27/2021      | 99           | 0.07        | 1.00             |                  |
| 8/28/2021      | 99           | 0.14        | 1.00             |                  |
| 8/29/2021      | 99           | 0.05        | 1.00             |                  |
| 9/1/2021       | 99           | 0.08        | 1.00             |                  |
| 9/6/2021       | 99           | 0.15        | 1.00             |                  |
| 9/13/2021      | 99           | 0.03        | 1.00             |                  |
| 9/14/2021      | 99           | 0.06        | 1.00             |                  |
| 9/16/2021      | 99           | 0.11        | 1.00             |                  |
| 9/18/2021      | 99           | 0.15        | 1.00             |                  |
| 9/19/2021      | 99           | 0.42        | 1.00             |                  |
| 9/24/2022      | 99           | 0.45        | 1.00             | Cedar Creek Fire |
| 9/25/2022      | 99           | 0.26        | 1.00             |                  |
| 9/26/2022      | 99           | 0.23        | 1.00             |                  |
| 9/27/2022      | 99           | 0.13        | 1.00             |                  |
| 9/29/2022      | 99           | 0.38        | 1.00             |                  |
| 9/30/2022      | 99           | 0.41        | 1.00             |                  |
| 10/3/2022      | 99           | 0.56        | 1.00             |                  |
| 10/4/2022      | 99           | 0.41        | 1.00             |                  |
| 10/7/2022      | 99           | 0.39        | 1.00             |                  |
| 10/8/2022      | 99           | 0.36        | 1.00             |                  |
| 10/10/2022     | 99           | 0.15        | 1.00             |                  |
| 10/12/2022     | 99           | 0.14        | 1.00             |                  |
| 9/15/2021      | 99           | 1.49        | 1.00             | Konza            |
| <b>median</b>  | <b>99.00</b> | <b>0.15</b> | <b>1.00</b>      |                  |
| <b>mean</b>    | <b>99.03</b> | <b>0.24</b> | <b>0.97</b>      |                  |
| <b>minimum</b> | <b>99.00</b> | <b>0.03</b> | <b>0.50</b>      |                  |
| <b>maximum</b> | <b>99.50</b> | <b>1.49</b> | <b>1.00</b>      |                  |

\* Data from these days were excluded from analysis because the vehicle was not moving for a large portion of the run.

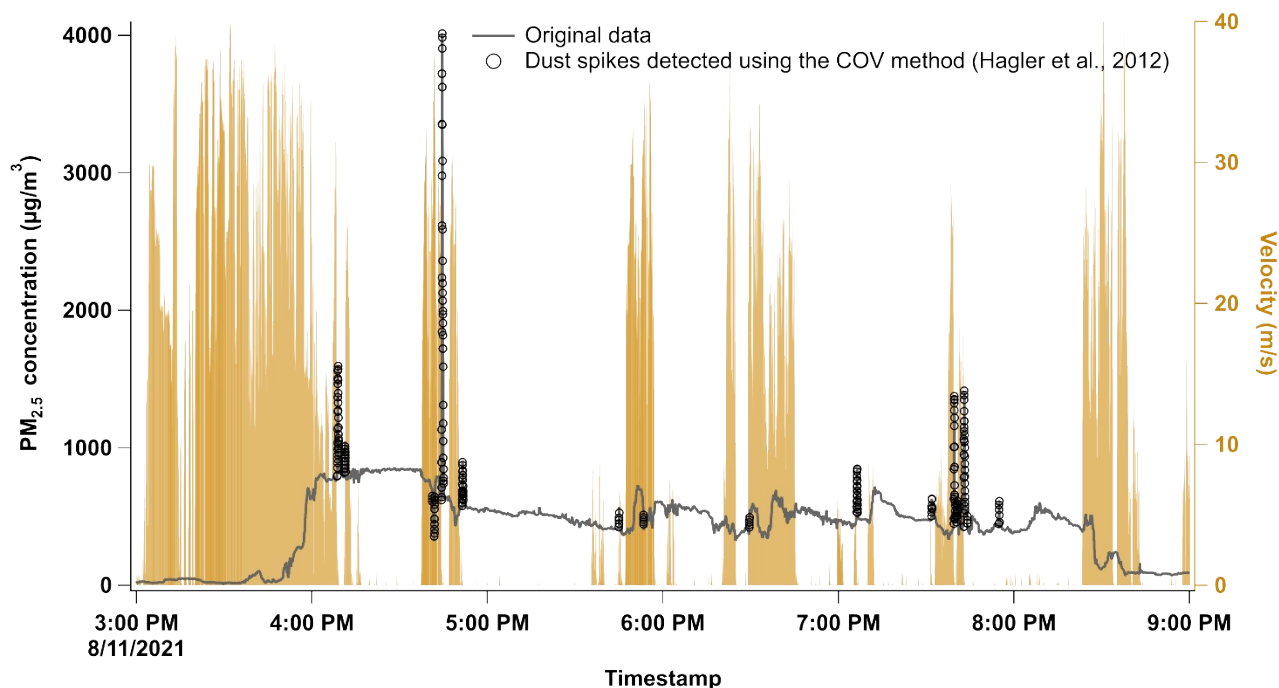

154

155 **Figure S5:** Example of dust spikes (resulting from vehicle acceleration on pavement) detected in the PM<sub>2.5</sub>  
 156 concentration data and removed using the COV method<sup>8</sup>. The velocity is shown on the right-hand axis in meters per  
 157 second. These data were collected near Shasta-Trinity County, CA during the Monument Fire on 08/11/2021. The  
 158 timestamp is given in Universal Coordinated Time.

159

### 160 S3 Details of instrument corrections

#### 161 VAMMS

162 For each VAMMS deployment, we compared the mean concentration from the corrected pDR-  
 163 1500 to the blank-corrected, filter-derived concentration determined via gravimetric analysis (Figure S6).  
 164 To account for mass gained or lost during handling and quality assurance checks, we subtracted the mean  
 165 value of the six blank filters (-0.0191 mg) from each deployment filter before calculating the filter-derived  
 166 concentration using the total sampling duration and flow values. A net mass loss in this range is consistent  
 167 with handling, relative humidity, and temperature effects for blank glass fiber filters<sup>10</sup>.

168

169 We did not correct the real-time pDR-1500 values using the gravimetric filter mass from each  
 deployment. During deployment, VAMMS data are interpreted immediately after collection by the ARA to

170 conduct time-sensitive analysis and response activities, rather than retroactively. In emergency response  
171 mode, users are not able to compare or correct the real-time pDR-1500 measurements to the integrated filter  
172 mass concentration. For this reason, we only show data with the Delp and Singer (2020)<sup>11</sup> correction in the  
173 text.

174 For the Cedar Creek fire, the mean pDR-1500 concentration was 30% higher than the concentration  
175 derived from the filter. We suspect that the Delp and Singer correction<sup>11</sup>, applied indiscriminately to all  
176 pDR-1500 data, may explain this difference. Road dust, which would have a different mass scattering  
177 efficiency than wildfire PM, would not be suitable for correction by the Delp and Singer equation<sup>11</sup>,  
178 potentially skewing the pDR-1500 mean concentration too high when impacted by dust. This impact would  
179 be most noticeable for the longer, on-road deployments, like the Cedar Creek or Monument fires, though  
180 we do not have a filter for the Monument fire to confirm.

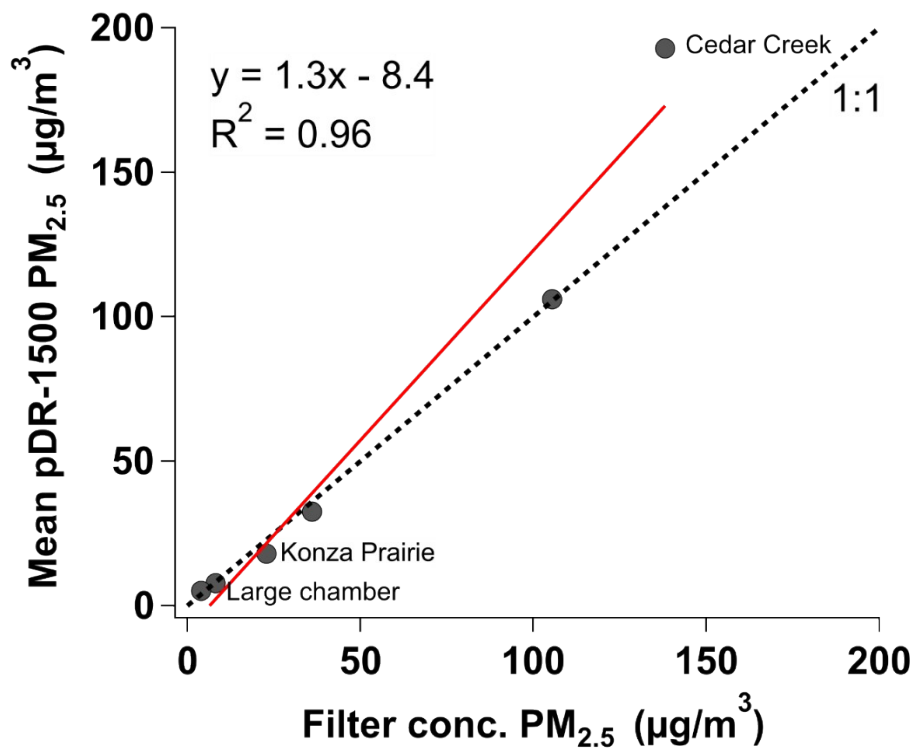

181

182 **Figure S6:** The mean pDR-1500 PM<sub>2.5</sub> concentration versus the concentration derived from the blank-corrected  
183 integrated filter mass for six deployments. Text labels are only given for deployments included in this analysis. Linear  
184 fit regression coefficients (red line) and the  $R^2$  value are shown. A one-to-one line is shown as the dotted black line.

185

186 **PurpleAir**

187 Using the collocated instruments at the Oakridge AQMS, we compared the performance of  
188 uncorrected PurpleAir data and data corrected using two wildfire-specific literature corrections to the on-  
189 site FEM during the Cedar Creek fire. We compared uncorrected raw data and data corrected using two  
190 smoke-specific correction factors to each other and to nearby reference monitors during both wildfires. The  
191 corrections were developed for wildfire smoke conditions using wildland fire smoke-impacted data from  
192 the Western U.S.<sup>12,13</sup>. The form of the first correction equation from Barkjohn et al. (2022)<sup>12</sup> is piecewise  
193 quadratic:

194  $\text{PAcf1} < 570$  (corrected = 300  $\mu\text{g}/\text{m}^3$  at 50% RH):

195 
$$\text{PM}_{2.5} = \text{PAcf1} \times 0.524 - 0.0862 \times \text{RH} + 5.75 \quad (1)$$

196  $570 \leq \text{PAcf1} < 611$ :

197 
$$\text{PM}_{2.5} = (0.0244 \times \text{PAcf1} - 13.9) \times [\text{Equation (3)}] + (1 - (0.0244 \times \text{PAcf1} - 13.9)) \times [\text{Equation (1)}] \quad (2)$$

198  $\text{PAcf1} \geq 611$  (corrected 400  $\mu\text{g}/\text{m}^3$ ):

199 
$$\text{PM}_{2.5} = \text{PAcf1}^2 \times 4.21 \times 10^{-4} + \text{PAcf1} \times 0.392 + 3.44 \quad (3)$$

200

201 Where 'PAcf1' is the raw cf=1 value from the A and B channels, 'RH' is the relative humidity measured by  
202 the PurpleAir, and  $\text{PM}_{2.5}$  is the corrected concentration value. The form of the second equation from Holder et al.  
203 (2020)<sup>13</sup> is linear:

204

205 
$$\text{PM}_{2.5} = -3.21 + 0.51 \times \text{PAcf1} \quad (4)$$

206

207 During the Cedar Creek fire, for the 18 days spanning the VAMMS monitoring period, we  
208 compared 1-hr averaged uncorrected and corrected measurements (N=501) from the five PurpleAir  
209 monitors to the regulatory monitor located at the Oakridge air quality monitoring station (Figure S7).  
210 Uncorrected PurpleAir data and data corrected using the extreme wildfire correction<sup>12</sup> overestimated

211 concentrations relative to the BAM-1022 (Figure S7). PurpleAir data corrected using the wildfire smoke  
212 correction<sup>13</sup> showed the best performance.

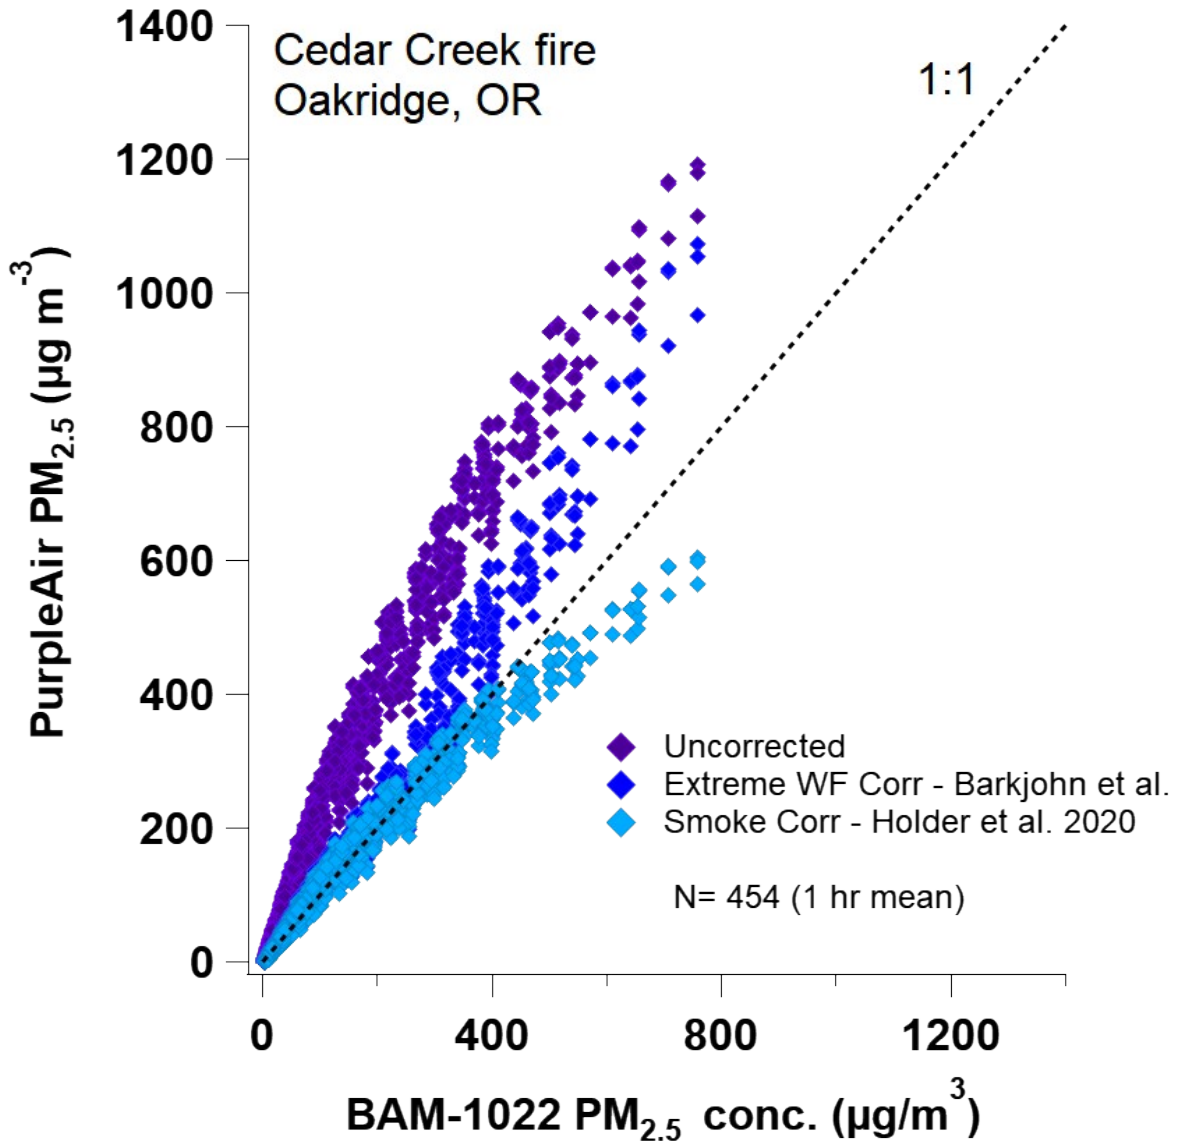

213

214 **Figure S7:** PurpleAir PM<sub>2.5</sub> concentration (uncorrected, corrected by extreme wildfire correction – Barkjohn et al.  
215 (2022)<sup>12</sup>, and corrected by wildfire smoke correction – Holder et al. (2020)<sup>13</sup> from three sensors (y-axis) versus the  
216 PM<sub>2.5</sub> concentration measured by the on-site BAM-1022 FEM instrument (x-axis). N is the number data points for  
217 each sensor. A one-to-one line is shown as a black dotted line. The data were collected between 09/24/2022 and  
218 10/13/2022 in Oakridge, Oregon during the Cedar Creek wildfire.

219

220 Performance statistics for each smoke-corrected PurpleAir are shown in Table S4. All three sensors  
 221 met the target ranges<sup>14</sup> for all metrics except for intercept. The PurpleAir had high precision between the  
 222 three instruments (COV < 5%) and all showed high linearity with minimal bias and moderate error. All but  
 223 one PurpleAir ('Oakridge 2') underestimated the BAM-1022 (slope < 1) concentration. The impact of this  
 224 was most notable at concentrations above 600  $\mu\text{g m}^{-3}$ . This suggests that at higher time resolutions (10-  
 225 min), PurpleAir data will underestimate peak concentrations. For the remaining analysis, we used only the  
 226 'best' of the three PurpleAir to compare to the VAMMS, 'Oakridge 1', which had the lowest RMSE.

227

228 **Table S4:** Performance statistics from the three PurpleAir (corrected with Holder et al. (2020) smoke-correction)  
 229 compared to the FEM BAM-1022 monitor at the Oakridge AQMS. Data were 1-hr averaged.  $R^2$  = coefficient of  
 230 determination, slope and intercept are the fit coefficients from a linear regression, RMSE = root mean square error,  
 231 and NRMSE = normalized root mean square error.

|                      | <b>Oakridge 1</b> | <b>Oakridge 2</b> | <b>Oakridge 3</b> |
|----------------------|-------------------|-------------------|-------------------|
| <b>R<sup>2</sup></b> | 0.98              | 0.98              | 0.98              |
| <b>Slope</b>         | 0.98              | 1.09              | 0.85              |
| <b>Intercept</b>     | 12.4              | 8.2               | 12.2              |
| <b>RMSE</b>          | 21.4              | 26.6              | 28.6              |
| <b>NRMSE</b>         | 0.16              | 0.22              | 0.24              |

232

233

234 Additionally, we looked at uncorrected and smoke corrected PurpleAir data during the Monument  
 235 wildfire using the FEM datasets and the nearest PurpleAir sensor, which supported the findings from the  
 236 Cedar Creek comparison (Figure S8). Notably, the two AQMS and the nearest PurpleAir were farther apart  
 237 in the Monument fire comparison (150 m and 3 km). Further, at the Weaverville AQMS, hourly ambient  
 238  $\text{PM}_{2.5}$  concentrations regularly exceeded 600  $\mu\text{g m}^{-3}$ , up to 1000  $\mu\text{g m}^{-3}$ . During these periods  
 239 (approximately three measurement days), the smoke corrected PurpleAir data underestimated the true  
 240 concentration.

241 A list of all PurpleAir sensors included in Monument fire analysis is given in Table S5. For Figure  
242 S8a, we used data from the BAM-1020 stationed at the Weaverville AQMS and a PurpleAir located  
243 approximately 150 m away at the Trinity County library (PA1). For Figure S8b, we used data from the  
244 BAM-1022 stationed at the Redding AQMS and a PurpleAir located approximately 3 km away at the Shasta  
245 County Health & Human Services Agency (PA17).

246

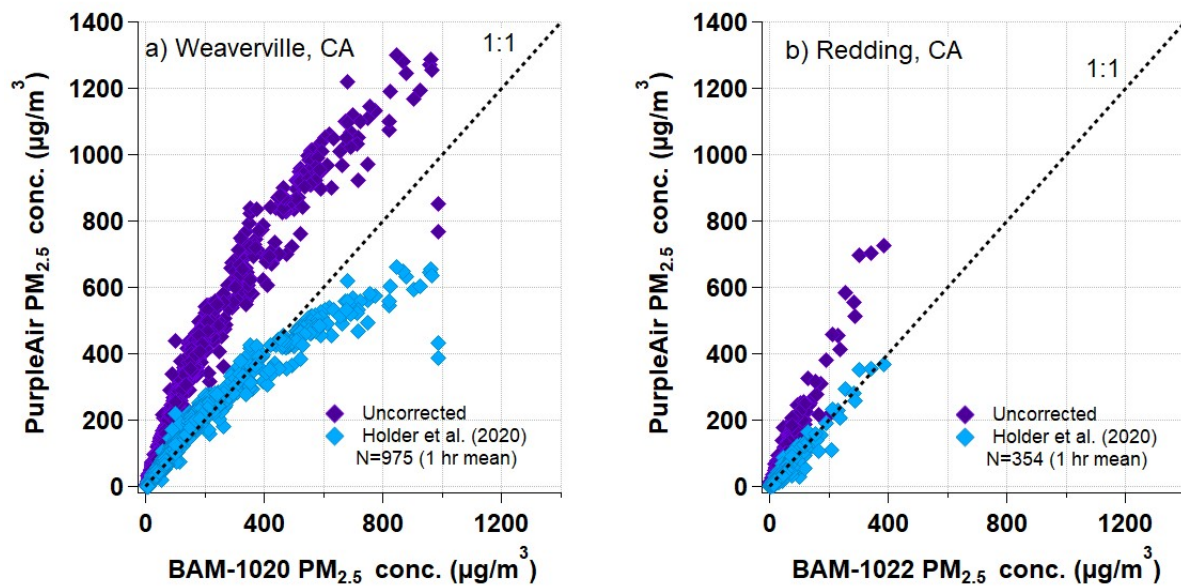

247

248 **Figure S8:** PurpleAir PM<sub>2.5</sub> concentration (uncorrected and corrected by wildfire smoke correction – Holder et al.  
249 (2020)<sup>13</sup> from a PurpleAir sensor versus the PM<sub>2.5</sub> concentration measured by the on-site FEM instrument (x-axis) for  
250 the (a) Weaverville AQMS and (b) Redding AQMS. N is the number data points. A one-to-one line is shown as a  
251 black dotted line. The data were collected between 08/10/2021 and 09/20/2021 near Shasta Trinity County during the  
252 Monument wildfire.

253

254

255

256

257



258 **Table S5:** GPS coordinates, ID number, name, N = number of data points (2-min averaged) during which VAMMS  
 259 passed within range, and mean distance from the VAMMS (in meters) for those passages for each of the twenty-seven  
 260 PurpleAir sensors included in the Monument wildfire analysis. Data were obtained through the Remote Sensing  
 261 Information Gateway Application Programming Interface (API) using an API key available through PurpleAir, Inc.

|      | <b>Longitude</b> | <b>Latitude</b> | <b>ID</b> | <b>Name</b>                               | <b>N</b> | <b>Distance (m)</b> |
|------|------------------|-----------------|-----------|-------------------------------------------|----------|---------------------|
| PA1  | -122.9424        | 40.7355         | 40001     | NC#119 Weaverville Library                | 236      | 150                 |
| PA2  | -122.3895        | 40.5962         | 7308      | Alder Gardens                             | 9        | 115                 |
| PA3  | -122.3744        | 40.5894         | 8038      | SHASTAAQMD-TURTLEBAYFORESTCAMP            | 11       | 315                 |
| PA4  | -122.3854        | 40.8900         | 8112      | SHASTAAQMD_LAKEHEADVOLFIRES               | 2        | 130                 |
| PA5  | -122.3234        | 40.7549         | 13039     | Bridge Bay at Shasta Lake                 | 3        | 117                 |
| PA6  | -122.4904        | 40.6097         | 19989     | Rock Creek                                | 5        | 950                 |
| PA7  | -122.9656        | 40.3635         | 55243     | Harrison Gulch                            | 5        | 25                  |
| PA8  | -122.3919        | 40.5806         | 57493     | Gerlinger Steel & Supply                  | 62       | 730                 |
| PA9  | -122.8062        | 40.6980         | 7976      | NC#75_Lewiston                            | 48       | 1000                |
| PA10 | -122.3958        | 40.5802         | 8058      | CARB_SMOKE_SHASTAAQMD_AQMDOFFICE          | 76       | 90                  |
| PA11 | -122.5932        | 40.6511         | 85907     | Whiskeytown NRA - Oak Bottom Fire Station | 16       | 95                  |
| PA12 | -122.3820        | 40.6162         | 103902    | Kennys Air                                | 5        | 600                 |
| PA13 | -122.9779        | 40.6341         | 107906    | B-Bar-K                                   | 25       | 1700                |
| PA14 | -122.8065        | 40.7072         | 13803     | Deadwood                                  | 24       | 65                  |
| PA15 | -122.7969        | 40.3176         | 13737     | McFarland ICP – Platina                   | 39       | 120                 |
| PA16 | -122.3665        | 40.6008         | 63133     | Nancy's Air                               | 7        | 500                 |
| PA17 | -122.3510        | 40.5582         | 8116      | SHASTAAQMD_ENTERPRISEEHSSQUAD             | 6        | 500                 |
| PA18 | -122.3444        | 40.5684         | 96061     | Foxtail Ct Research Center                | 13       | 670                 |
| PA19 | -122.3920        | 40.5991         | 35745     | Del Mar Ave                               | 4        | 600                 |
| PA20 | -122.4095        | 40.5882         | 96923     | ShastaAQMD_SC2_ShastaHS                   | 29       | 225                 |
| PA21 | -122.9437        | 40.7312         | 118981    | Wood shed                                 | 14       | 415                 |
| PA22 | -122.9368        | 40.7272         | 109050    | CATC-OD                                   | 125      | 50                  |
| PA23 | -122.3720        | 40.5894         | 109958    | TB-SS sensor                              | 31       | 475                 |
| PA24 | -122.4051        | 40.5537         | 112622    | Sungold Circle                            | 1        | 620                 |
| PA25 | -122.4295        | 40.5888         | 112920    | Sunday                                    | 16       | 575                 |
| PA26 | -123.0562        | 40.7242         | 13817     | Junction City                             | 56       | 400                 |
| PA27 | -123.1651        | 40.5526         | 36685     | NC#121_USFS Shasta-Trinity                | 69       | 40                  |

263 **Ambilabs nephelometer**

264 Since the Ambilabs nephelometer was corrected to the on-site BAM 1022 monitor, consequently,  
 265 the 1-hr averaged data from the nephelometer was nearly identical to the 1-hr BAM 1022 data ( $R^2 = 1$ ,  
 266 slope = 1, intercept =  $0 \mu\text{g m}^{-3}$ , RMSE =  $0.03 \mu\text{g m}^{-3}$ ).

267

268 **S4 AQI PM<sub>2.5</sub> Category Definitions**

269 **Table S6:** Air Quality Index color, category name, and corresponding PM<sub>2.5</sub> concentration limits.

| <b>Category Colors</b> | <b>Category Names</b>          | <b>PM<sub>2.5</sub> Concentration Limits (µg m<sup>-3</sup>)</b> |
|------------------------|--------------------------------|------------------------------------------------------------------|
| Green                  | Good                           | 0 – 12.0                                                         |
| Yellow                 | Moderate                       | 12.1 – 35.4                                                      |
| Orange                 | Unhealthy for sensitive groups | 35.5 – 55.4                                                      |
| Red                    | Unhealthy                      | 55.5 – 150.4                                                     |
| Purple                 | Very unhealthy                 | 150.5 – 250.4                                                    |
| Maroon                 | Hazardous                      | 250.5 – 500.4                                                    |
| Gray                   | Beyond AQI                     | ≥ 500.5                                                          |

270

271 S5 Details of Cedar Creek fire

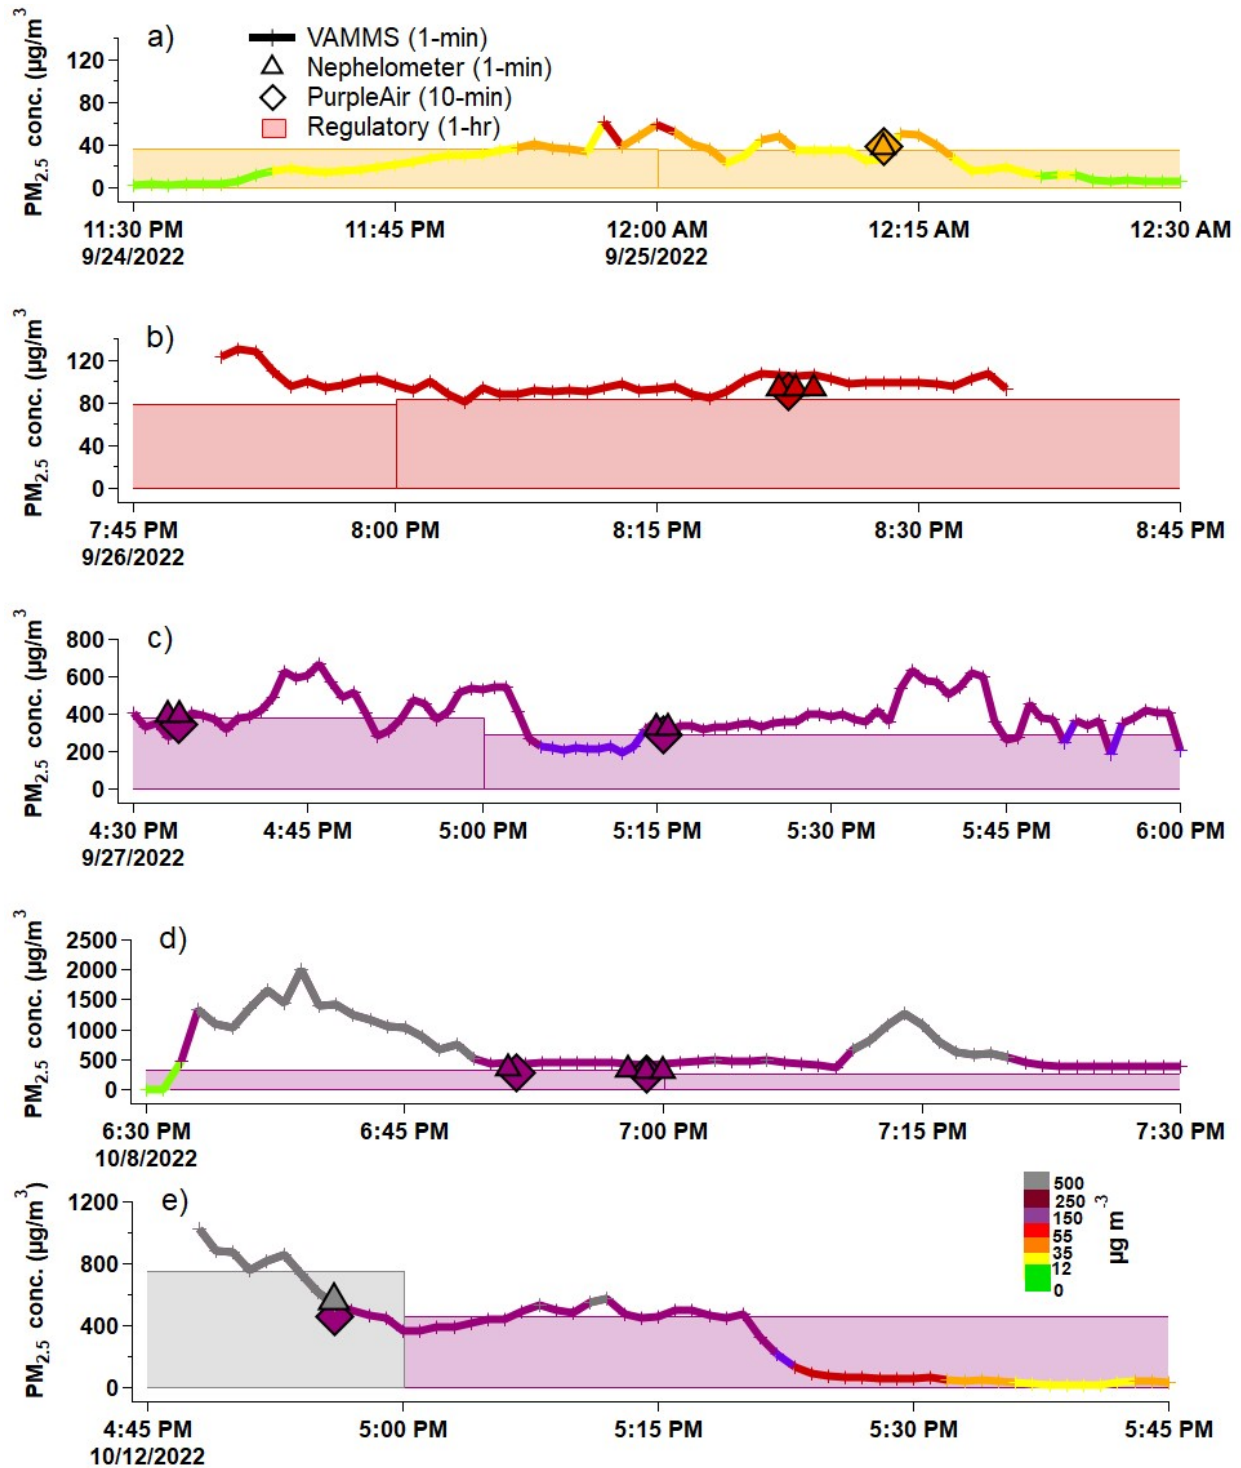

272

273 **Figure S9:** Timeseries of VAMMS (1-min), nephelometer (1-min), PurpleAir (10-min), and BAM 1022 (60-min)  
 274 PM<sub>2.5</sub> measurements at the Oakridge, OR air quality monitoring station during the Cedar Creek fire, colored by  
 275 the corresponding approximate AQI category. Data from the nephelometer and PurpleAir are shown only when  
 276 the VAMMS was within 400 m of them. The timestamp is given in Universal Coordinated Time.

277 **S6 Details of Konza Prairie prescribed burns**

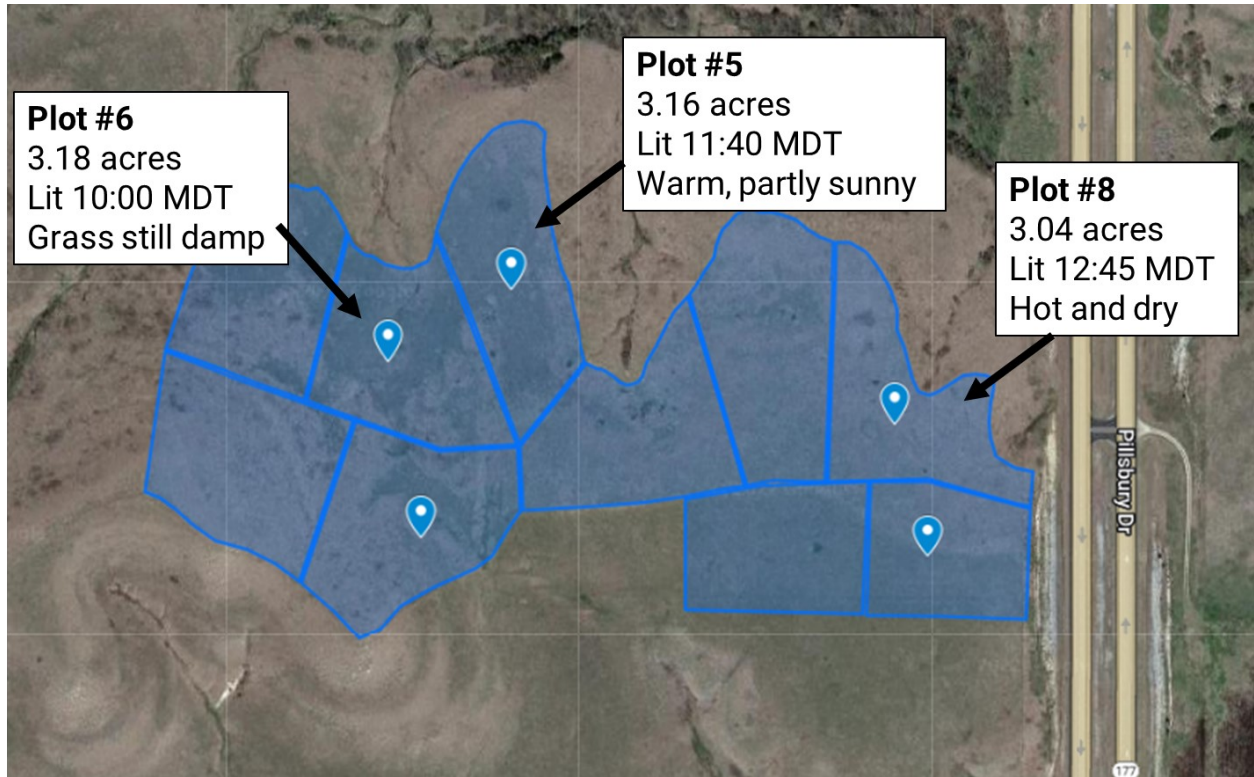

278

279 **Figure S10:** Map of Konza Prairie Biological Research Station near Manhattan, Kansas. The blue regions indicate  
280 different plots and the lines between them represent fire breaks. The blue markers indicate the five plots that were  
281 burned during the 2-day monitoring period. The three plots burned on 09/15/2021 (day 2) are indicated with arrows  
282 and text labels which provide information on the plot size, start time of each burn and the conditions. Google My  
283 Maps. Manhattan, Kansas, USA. Accessed: November 17, 2022. © **Google Maps 2022.**

284

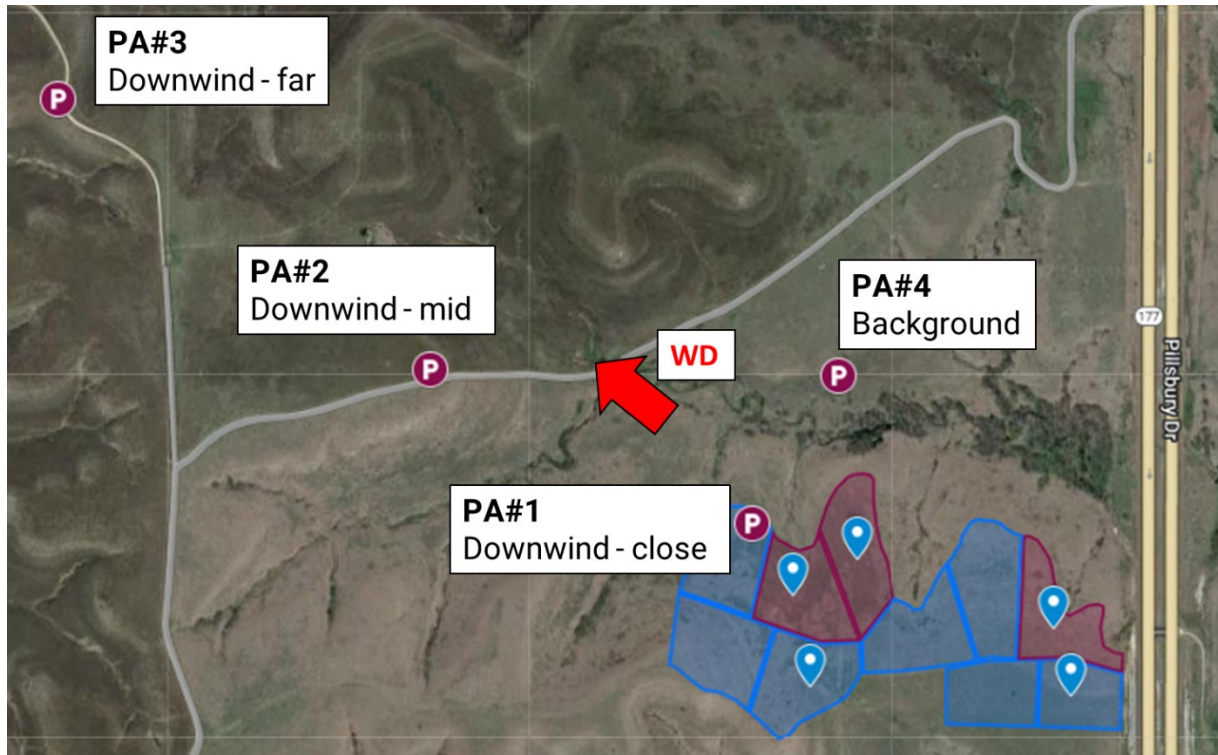

285

286 **Figure S11:** Map of Konza Prairie Biological Research Station near Manhattan, Kansas. The blue regions indicate  
 287 different plots and the lines between them represent fire breaks. The blue markers indicate the five plots that were  
 288 burned during the 2-day monitoring period. The three plots burned on 09/15/2021 (day 2) are indicated in maroon.  
 289 The locations of the four PurpleAir (PA) sensors are indicated with maroon “P” icons. The PurpleAir are numbered  
 290 and labelled with a description of their approximate location compared to the plots. The red arrow indicates the primary  
 291 wind direction (WD) during the burns. Google My Maps. Manhattan, Kansas, USA. Accessed: November 17, 2022.  
 292 © Google Maps 2022.

293

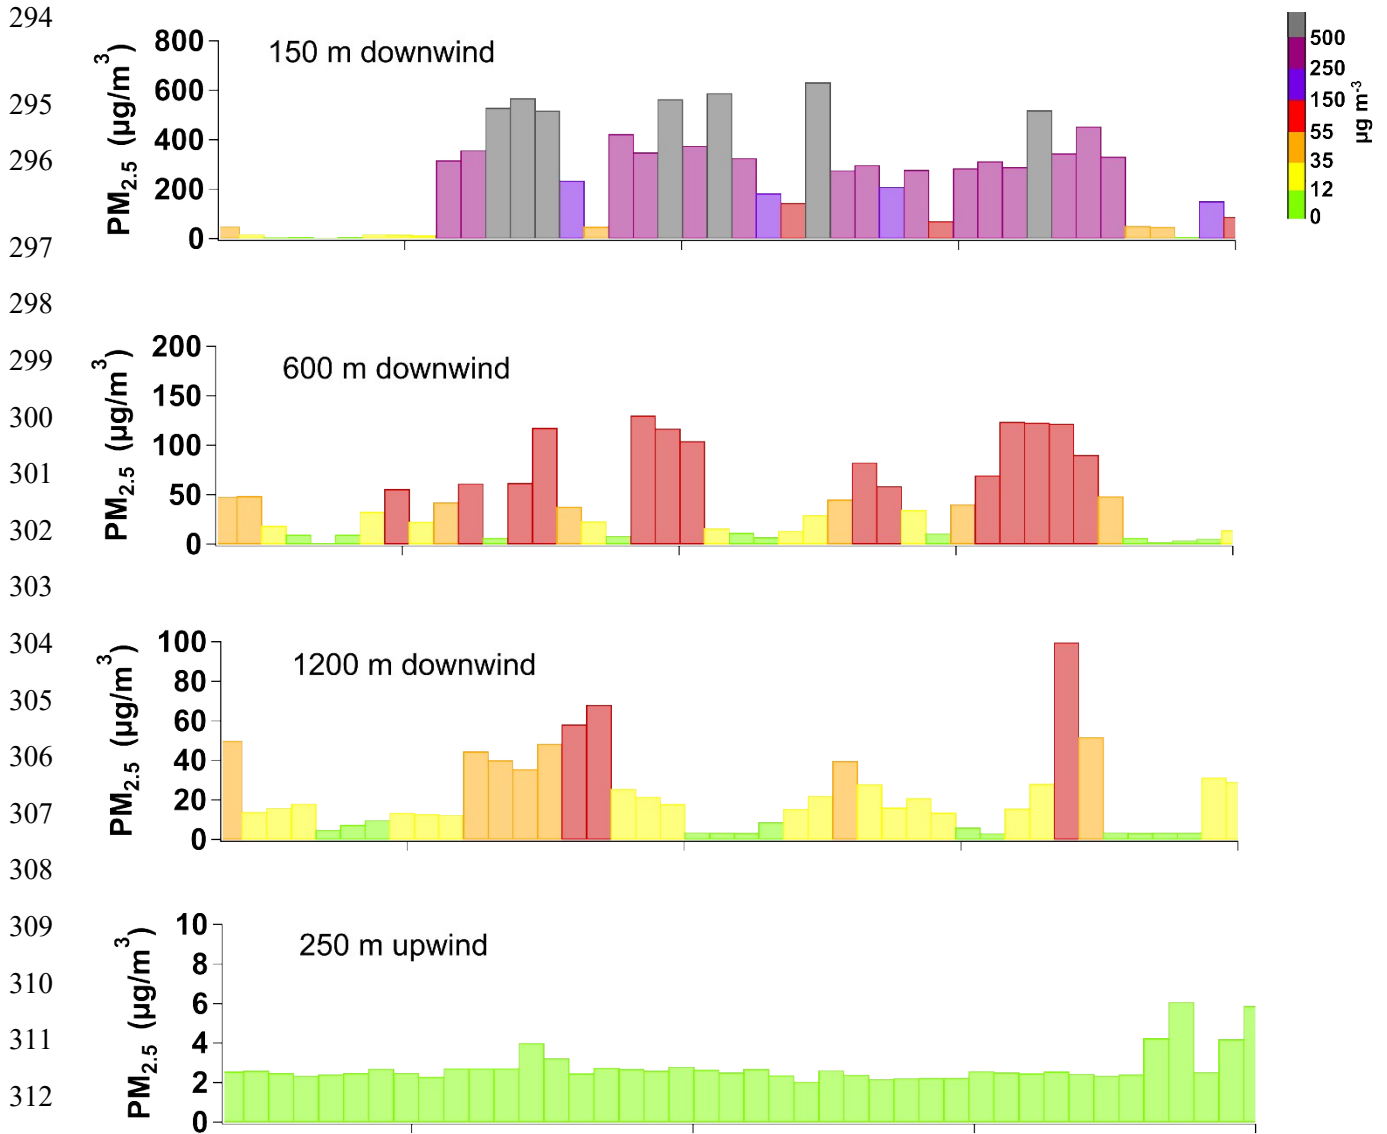

313 Figure S12: Timeseries 9/15/2021  
 314 from the four temporary, stationary PurpleAir sensors during one 3-acre  
 315 controlled burn at the Konza Prairie Biological Research Station on 09/15/2021. Each bar represents an 80-s  
 316 measurement, colored by the 'approximate AQI' concentration. Three sensors were deployed at different distances  
 317 downwind of the plots (a-c) and one sensor was deployed upwind to record the background concentration (d). The  
 318 timestamp is given in Universal Coordinated Time.

321

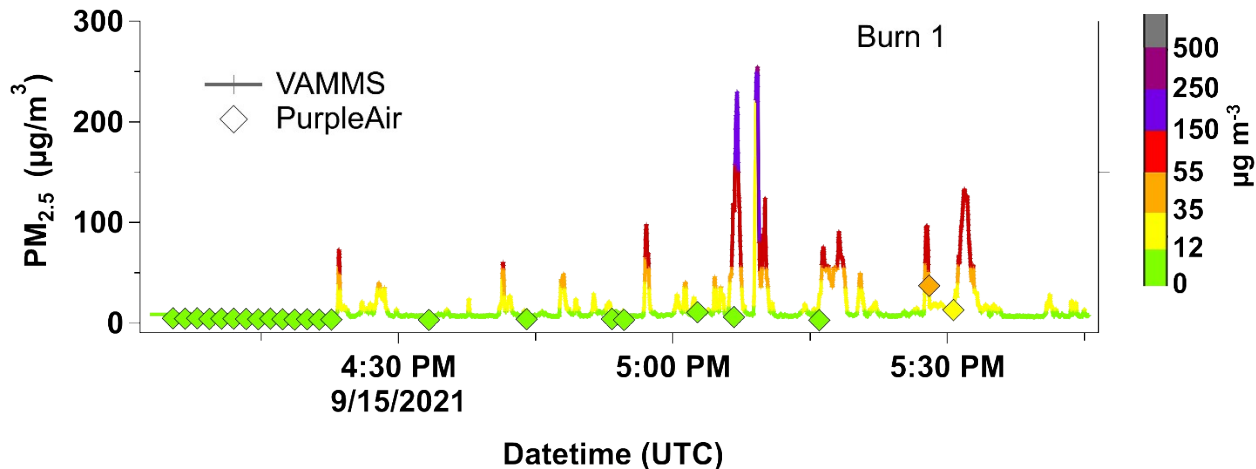

322

323

324

325

326

327

328

329

330

331

332

333

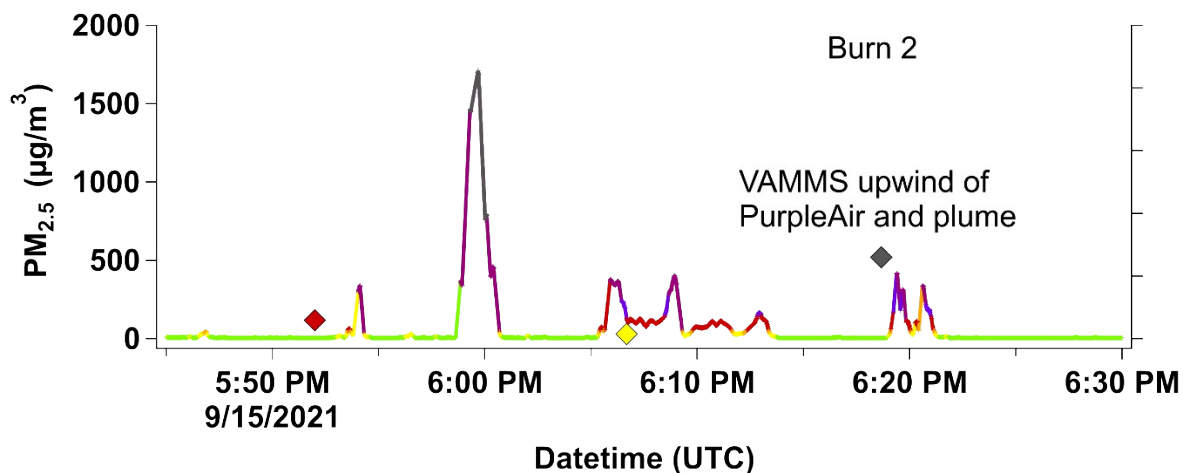

334

335

336

337

338

339

340

341

342

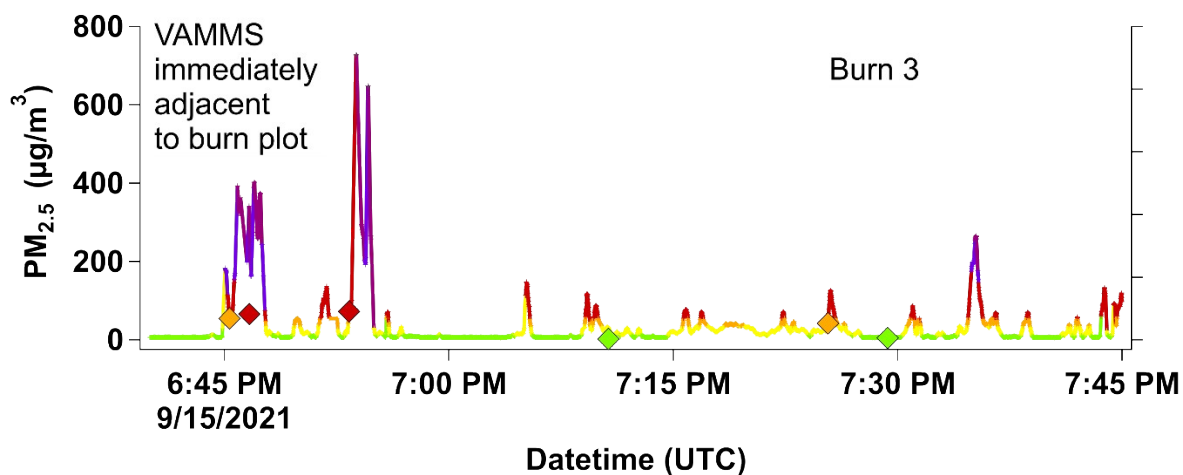

343 **Figure S13:** Timeseries of VAMMS (1-s) and PurpleAir (80-s) measurements during prescribed burning on  
344 09/15/2021. Each panel shows the timeseries for the controlled burn of one 3-acre plot. Data from the PurpleAir are  
345 shown only when the VAMMS was within 100 m of the instruments. The timestamp is in Universal Coordinated  
346 Time.

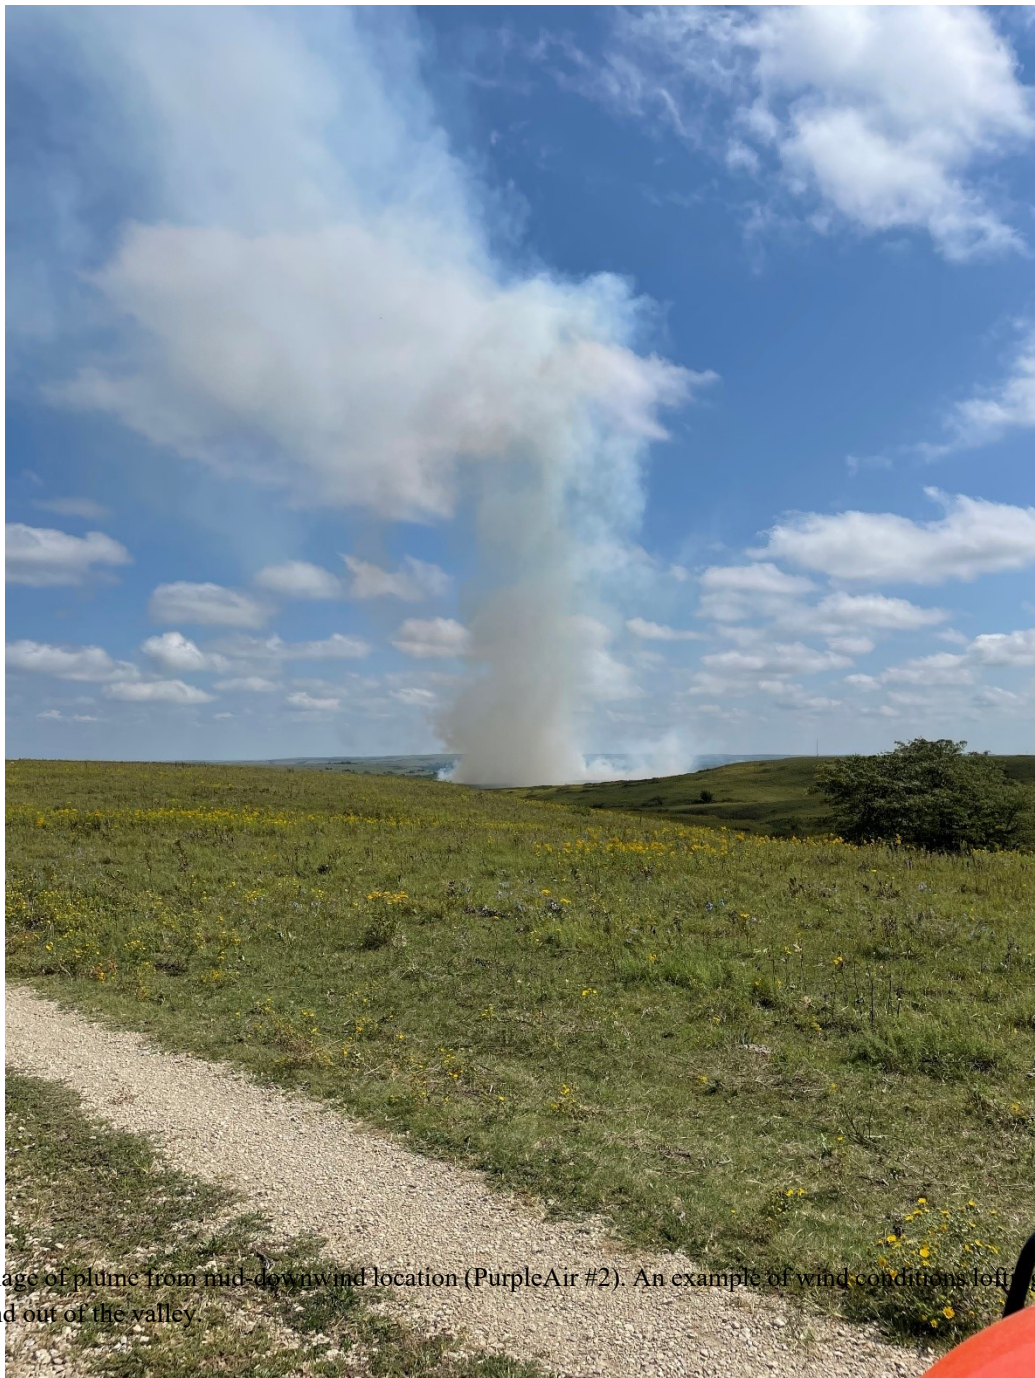

347

348 **Figure S14:** Image of plume from mid-downwind location (PurpleAir #2). An example of wind conditions leaving the  
349 plume above and out of the valley

350



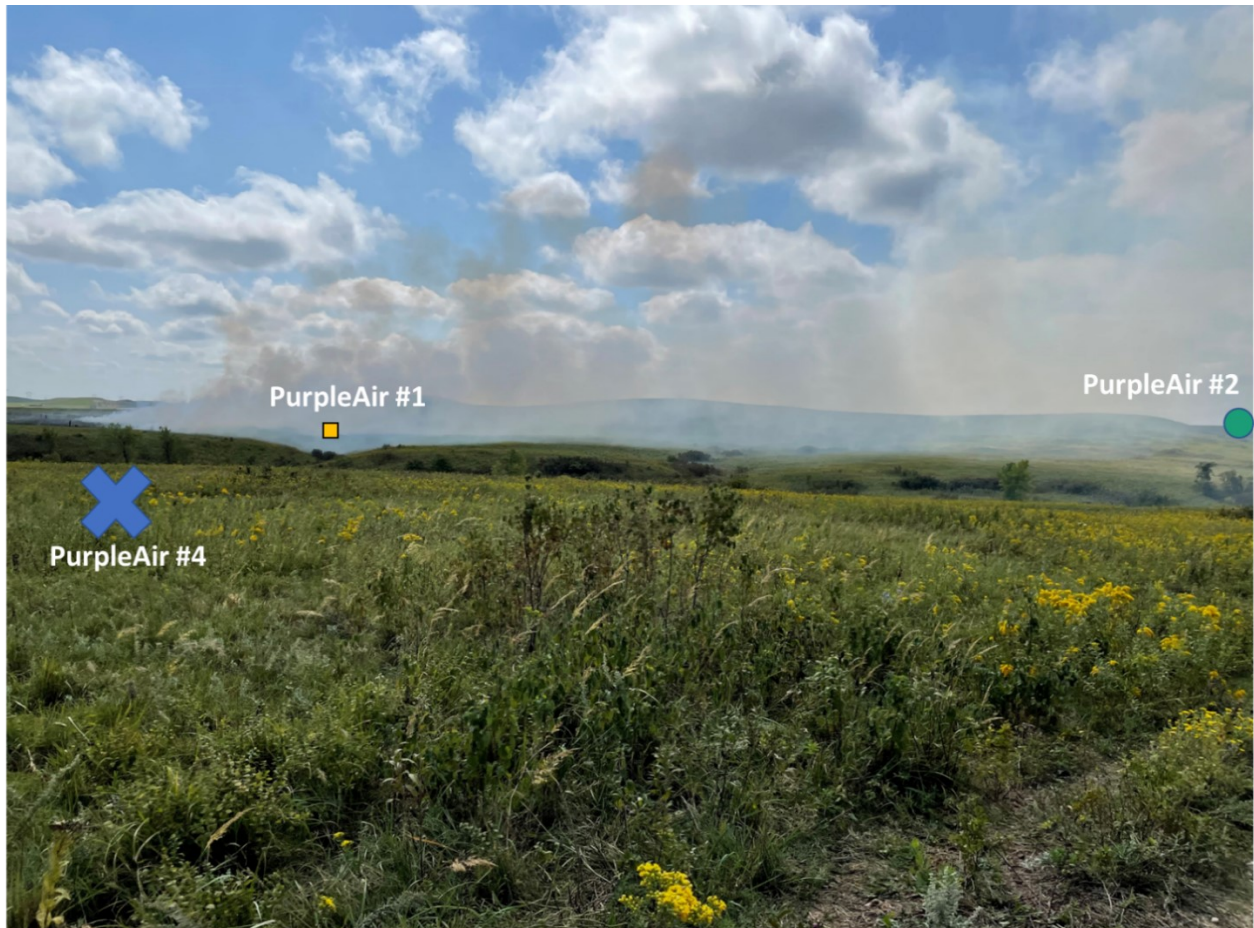

351

352 **Figure S15:** Image of plume from near upwind (PurpleAir #4) location. The downwind – close (PurpleAir #1) and  
353 downwind – mid (PurpleAir #2) locations are also indicated. An example of the wind conditions causing the plume to  
354 fumigate the valley.

355

356

357

358

359

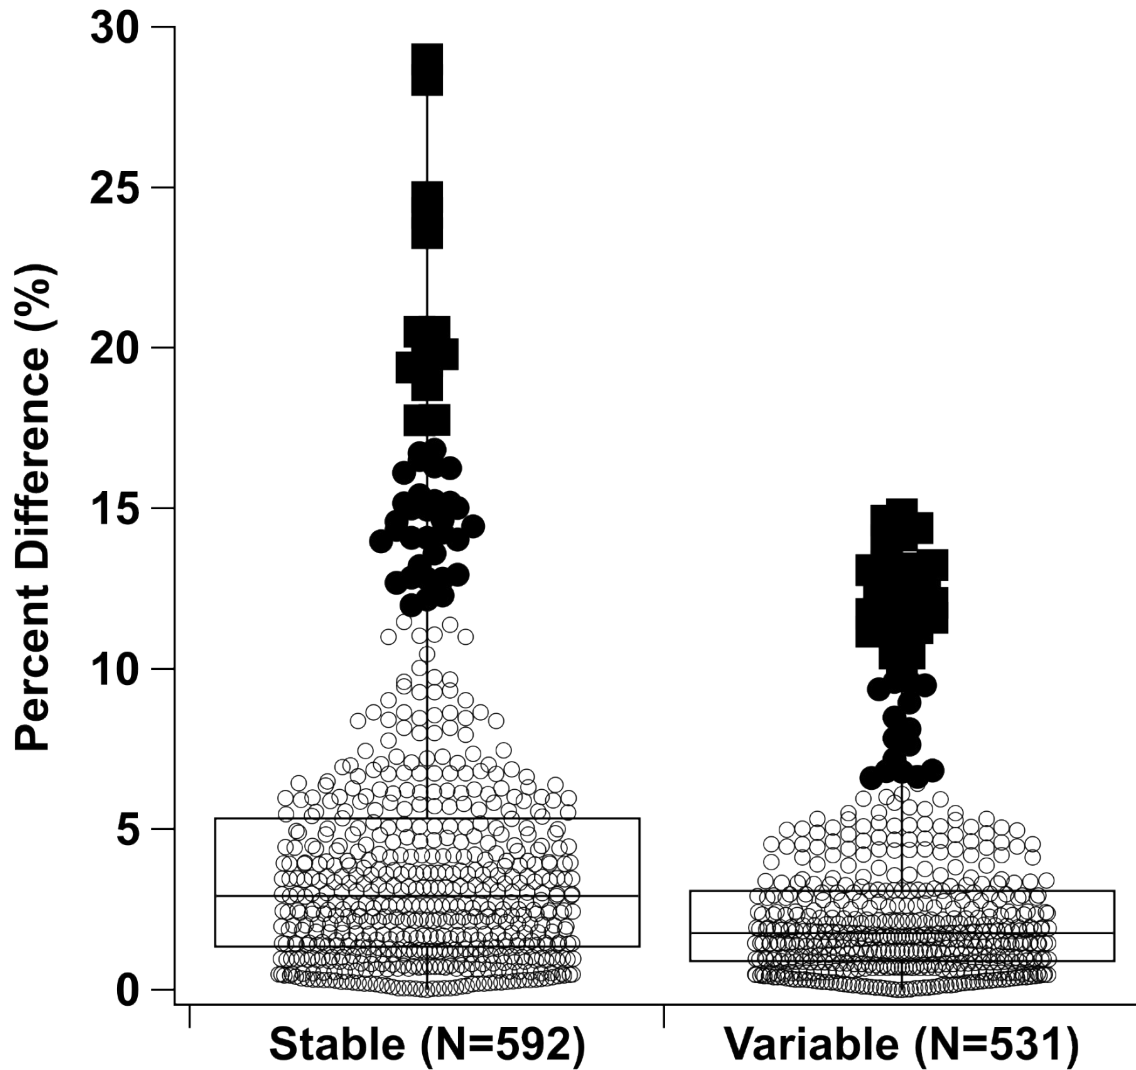

361  
362 **Figure S16:** Box plots of the percent difference of the 1-s VAMMS concentration measurement compared to the 1-  
363 min mean VAMMS measurements for ‘stable’ and ‘variable’ conditions identified during the Cedar Creek fire analysis  
364 (Section 3.4) For the Tukey boxplots, the median is the line, the top and bottom of the box are the 75<sup>th</sup> and 25<sup>th</sup>  
365 quartiles, the whiskers are the minimum and maximum value. Outliers (1.5 \* interquartile range) are shown as dark  
366 circles and far outliers (3 \* interquartile range) as dark squares. These data were collected between 09/25/2022 and  
367 10/12/2022 during the Cedar Creek wildfire near Oakridge, OR.

368

369

370

371 **References**

- 372 (1) Hinds, W. C. *Aerosol Technology: Properties, Behavior, and Measurement of Airborne Particles*,  
373 *Edition 2*; John Wiley & Sons: Hoboken, NJ, 1999.
- 374 (2) Von Der Weiden, S.-L.; Drewnick, F.; Borrmann, S. Particle Loss Calculator – a New Software Tool  
375 for the Assessment of the Performance of Aerosol Inlet Systems. *Atmos. Meas. Tech.* **2009**, *2* (2), 479–  
376 494. <https://doi.org/10.5194/amt-2-479-2009>.
- 377 (3) Laing, J. R.; Jaffe, D. A.; Hee, J. R. Physical and Optical Properties of Aged Biomass Burning Aerosol  
378 from Wildfires in Siberia and the Western USA at the Mt. Bachelor Observatory. *Atmos. Chem. Phys.*  
379 **2016**, *16* (23), 15185–15197. <https://doi.org/10.5194/acp-16-15185-2016>.
- 380 (4) Shirman, T.; Shirman, E.; Liu, S. Evaluation of Filtration Efficiency of Various Filter Media in  
381 Addressing Wildfire Smoke in Indoor Environments: Importance of Particle Size and Composition.  
382 *Atmosphere* **2023**, *14* (12), 1729. <https://doi.org/10.3390/atmos14121729>.
- 383 (5) Reid, J. S.; Koppmann, R.; Eck, T. F.; Eleuterio, D. P. A Review of Biomass Burning Emissions Part  
384 II: Intensive Physical Properties of Biomass Burning Particles. *Atmos. Chem. Phys.* **2005**, *5* (3), 799–  
385 825. <https://doi.org/10.5194/acp-5-799-2005>.
- 386 (6) Liu, Y.; Meng, X.; Wu, Z.; Huang, D.; Wang, H.; Chen, J.; Chen, J.; Zong, T.; Fang, X.; Tan, T.; Zhao,  
387 G.; Chen, S.; Zeng, L.; Guo, S.; Huang, X.; He, L.; Zeng, L.; Hu, M. The Particle Phase State during  
388 the Biomass Burning Events. *Science of The Total Environment* **2021**, *792*, 148035.  
389 <https://doi.org/10.1016/j.scitotenv.2021.148035>.
- 390 (7) Sakamoto, K. M.; Allan, J. D.; Coe, H.; Taylor, J. W.; Duck, T. J.; Pierce, J. R. Aged Boreal Biomass-  
391 Burning Aerosol Size Distributions from BORTAS 2011. *Atmos. Chem. Phys.* **2015**, *15* (4), 1633–  
392 1646. <https://doi.org/10.5194/acp-15-1633-2015>.
- 393 (8) Hagler, G. S. W.; Lin, M.-Y.; Khlystov, A.; Baldauf, R. W.; Isakov, V.; Faircloth, J.; Jackson, L. E.  
394 Field Investigation of Roadside Vegetative and Structural Barrier Impact on Near-Road Ultrafine  
395 Particle Concentrations under a Variety of Wind Conditions. *Science of The Total Environment* **2012**,  
396 *419*, 7–15. <https://doi.org/10.1016/j.scitotenv.2011.12.002>.
- 397 (9) Brantley, H. L.; Hagler, G. S. W.; Kimbrough, E. S.; Williams, R. W.; Mukerjee, S.; Neas, L. M.  
398 Mobile Air Monitoring Data-Processing Strategies and Effects on Spatial Air Pollution Trends.  
399 *Atmospheric Measurement Techniques* **2014**, *7* (7), 2169–2183. [https://doi.org/10.5194/amt-7-2169-](https://doi.org/10.5194/amt-7-2169-2014)  
400 2014.
- 401 (10) Brown, A. S.; Yardley, R. E.; Quincey, P. G.; Butterfield, D. M. Studies of the Effect of Humidity  
402 and Other Factors on Some Different Filter Materials Used for Gravimetric Measurements of Ambient  
403 Particulate Matter. *Atmospheric Environment* **2006**, *40* (25), 4670–4678.  
404 <https://doi.org/10.1016/j.atmosenv.2006.04.028>.
- 405 (11) Delp, W. W.; Singer, B. C. Wildfire Smoke Adjustment Factors for Low-Cost and Professional  
406 PM2.5 Monitors with Optical Sensors. *Sensors* **2020**, *20* (13), 3683.  
407 <https://doi.org/10.3390/s20133683>.
- 408 (12) Barkjohn, K. K.; Holder, A. L.; Frederick, S. G.; Clements, A. L. Correction and Accuracy of  
409 PurpleAir PM2.5 Measurements for Extreme Wildfire Smoke. *Sensors* **2022**, *22* (24), 9669.  
410 <https://doi.org/10.3390/s22249669>.
- 411 (13) Holder, A. L.; Mebust, A. K.; Maghran, L. A.; McGown, M. R.; Stewart, K. E.; Vallano, D. M.;  
412 Elleman, R. A.; Baker, K. R. Field Evaluation of Low-Cost Particulate Matter Sensors for Measuring  
413 Wildfire Smoke. *Sensors* **2020**, *20* (17), 4796. <https://doi.org/10.3390/s20174796>.
- 414 (14) Duvall, R.; Clements, A.; Hagler, G. S. W.; Kamal, A.; Vasu Kilaru, L.; Goodman, L.; Frederick, S.  
415 G.; Johnson Barkjohn, K.; VonWald, I.; Greene, D.; Dye, T. *Performance Testing Protocols, Metrics,*  
416 *and Target Values for Fine Particulate Matter Air Sensors: Use in Ambient, Outdoor, Fixed Site, Non-*  
417 *Regulatory Supplemental and Informational Monitoring Applications*; EPA/600/R-20/280; U.S. EPA  
418 Office of Research and Development: Washington, DC, 2021.  
419
